# Supplementary figures and images for: Yellow-Green Leaf 19 Encoding a Specific and Conservative Protein for Photosynthetic Organisms Affects Tetrapyrrole Biosynthesis, Photosynthesis, and Reactive Oxygen Species Metabolism in Rice
Source: MDPI journal article supplement (doi:10.3390/ijms242316762), 2023-11-25

1 2 3 4 5 6 7 8 9 10 + M - O

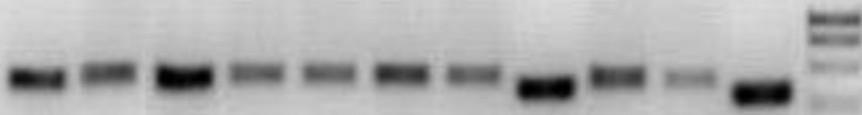

Supplement: s1 [file s1]
